1 Patterns of individual variation in visual pathway structure and  
2 function in the sighted and blind

3 Geoffrey K. Aguirre\*<sup>1</sup>, Ritobrato Datta<sup>1</sup>, Noah C. Benson<sup>1</sup>, Sashank Prasad<sup>1</sup>, Samuel  
4 G. Jacobson<sup>2</sup>, Artur V. Cideciyan<sup>2</sup>, Holly Bridge<sup>3</sup>, Kate E. Watkins<sup>4</sup>, Omar H. Butt<sup>1</sup>,  
5 Alexandra S. Dain<sup>1</sup>, Lauren Brandes<sup>1</sup> and Efstathios D. Gennatas<sup>1</sup>

6 <sup>1</sup>Department of Neurology, Perelman School of Medicine, University of Pennsylvania,  
7 Philadelphia, PA 19104, USA

8 <sup>2</sup>Department of Ophthalmology, Perelman School of Medicine, University of  
9 Pennsylvania, Philadelphia, PA 19104, USA

10 <sup>3</sup>FMRIB Centre, Clinical Neurosciences, University of Oxford, Oxford OX3 9DU,  
11 United Kingdom

12 <sup>4</sup>Department of Experimental Psychology, University of Oxford, Oxford, OX1 3UD,  
13 United Kingdom

---

\*Corresponding author: [aguirreg@mail.med.upenn.edu](mailto:aguirreg@mail.med.upenn.edu)

## 14 Abstract

15 Many structural and functional brain alterations accompany blindness. In normally sighted  
16 people, there is correlated individual variation in some visual pathway structures. Here we  
17 examined if the changes in brain anatomy produced by blindness alter this pattern of variation.  
18 We derived eight measures of central visual pathway anatomy from an MPRAGE image of the  
19 brain from 59 sighted and 53 blind people. These measures showed highly significant differences  
20 in mean size between the sighted and blind cohorts. When we examined the measurements  
21 across individuals within each group, we found three clusters of correlated variation, with V1  
22 surface area and pericalcarine volume linked, and independent of the thickness of V1 cortex.  
23 These two clusters were in turn relatively independent of the volumes of the optic chiasm  
24 and lateral geniculate nucleus. This same pattern of variation in visual pathway anatomy was  
25 found in the sighted and the blind. Anatomical changes within these clusters were graded by the  
26 duration of blindness, with those subjects with a post-natal onset of blindness having alterations  
27 in brain anatomy that were intermediate to those seen in the sighted and congenitally blind.  
28 Many of the blind and sighted subjects also contributed BOLD fMRI measures of cross-modal  
29 responses within visual cortex, and a diffusion tensor imaging measure of fractional anisotropy  
30 within the optic radiations and the splenium of the corpus callosum. We again found group  
31 differences between the blind and sighted in these measures. The previously identified clusters  
32 of anatomical variation were also found to be differentially related to these additional measures:  
33 across subjects, V1 cortical thickness was related to cross-modal activation, and the volume  
34 of the optic chiasm and lateral geniculate was related to fractional anisotropy in the visual  
35 pathway. Our findings show that several of the structural and functional effects of blindness  
36 may be reduced to a smaller set of dimensions. It also seems that the changes in the brain that  
37 accompany blindness are on a continuum with normal variation found in the sighted.

## 38 Introduction

39 Blindness produces a well-documented set of structural changes along the visual pathway of  
40 the human brain. The optic nerves, lateral geniculate nucleus, and pericalcarine white matter  
41 are reduced in volume [1–4], as is the splenium of the corpus callosum, which connects the  
42 hemispheres of the visual cortex [5]. While the surface area of primary visual cortex is reduced  
43 [6, 7], the gray matter layer of this area is thickened [6–8], perhaps reflecting altered synaptic  
44 pruning during cortical maturation [9, 10].

45 Substantial variation in visual pathway anatomy is also found across normally sighted people.  
46 There is a two-to-three fold variation in the size of visual pathway structures, and the relative  
47 size of some of these structures has been found to co-vary across individuals [11]. This diversity  
48 (in the case of occipital surface area) is influenced by both genetic and environmental factors  
49 [12–14] and is related to differences in visual acuity [15, 16]. Different visual pathway structures  
50 vary in size independently across people, suggesting the influence of separable factors [17].

51 What is the relationship between normal variation in visual pathway anatomy and the effects  
52 of blindness? We addressed this question in structural magnetic resonance image (MRI) data  
53 collected from 53 blind and 59 normally sighted controls. We studied a heterogeneous group  
54 of blind subjects, ranging from those with developmental anophthalmia [8, 18] to those with  
55 a post-natal onset of blindness in adulthood. Using fully automated methods, we extracted 8  
56 anatomical measures along the visual pathway. We examined how anatomical elements of the  
57 visual pathway vary in concert and independently in the sighted, and then tested if the same  
58 or a different pattern of variation is found in the blind.

59 Blindness also produces brain changes not reflected in macroscopic structure. There is a  
60 decrease in the coherence of white matter fiber tracks along the visual pathway and in the  
61 splenium of the corpus callosum [8, 19, 20] although see [18]. Changes in function are also  
62 observed, most notably the development of “cross-modal” responses, in which occipital cortical  
63 areas respond to non-visual stimulation [21, 22]. As a further test of the independence of forms  
64 of anatomical variation, we asked if individual differences in the structure of the visual pathway  
65 can account for variation in these other measures.

---

## 66 **Methods**

### 67 **Subjects**

68 MRI anatomical data were acquired for 59 sighted (24 men, 35 women, mean age  $39 \pm 14$  SD)  
69 and 53 blind subjects (23 men, 30 women, mean age  $44 \pm 18$  SD). Table 1 provides additional  
70 information for the blind group. Thirteen subjects with blindness from Leber Congenital Amau-  
71 rosis were of three different genotypes (RPE65, CEP290, CRB1) and have been the subject of  
72 prior reports [23–25]. The 6 subjects with bilateral congenital anophthalmia were studied at  
73 Oxford and have been described previously [8, 18]. An additional 26 sighted subjects were  
74 studied at Oxford; their data were used only to account for systematic differences in scanner  
75 properties between the Penn and Oxford sites. An additional 13 sighted subjects were studied  
76 at the University of Pennsylvania on two separate occasions; their data was used only to ex-  
77 amine the test / re-test reliability of the anatomical measures. Studies were approved by the  
78 University of Pennsylvania Institutional Review Board and by the Oxfordshire National Health  
79 Service Research Ethics Committee. All subjects provided informed consent.

### 80 **Magnetic Resonance Imaging**

#### 81 **Overview**

82 A T1-weighted, anatomical magnetization-prepared rapid gradient-echo (MPRAGE) image was  
83 acquired for every subject. A 3-Tesla Siemens Trio with an 8-channel Siemens head coil was  
84 used at the University of Pennsylvania, and a 3-Tesla Siemens Trio with a 12-channel coil at  
85 Oxford. A set of 8 anatomical measures along the central visual pathway was derived from the  
86 MPRAGE image from each of the 112 subjects in the study. These were measures of left and  
87 right V1 cortical thickness, left and right V1 surface area, left and right pericalcarine white  
88 matter volume, lateral geniculate volume, and optic chiasm volume. Automated techniques  
89 were used to define these anatomical regions and derive the corresponding measurements from  
90 each subject, with visual inspection of the results for quality assurance. A set of control regions  
91 were also defined for the auditory system.

92 Additional structural and functional MRI data were collected in a sub-set of blind and  
93 sighted subjects at the University of Pennsylvania. These additional measures were arterial  
94 spin label (ASL) perfusion, diffusion tensor imaging (DTI), and Blood Oxygen Level Dependent  
95 (BOLD) functional MRI during the presentation of auditory stimuli. Individual differences in  
96 these measures were compared to individual differences in the anatomical measures derived from  
97 the MPRAGE images.

98 Imaging was conducted at the University of Pennsylvania using two, slightly different proto-  
99 cols. After confirming for each of our imaging measures that there were no significant differences  
100 in the mean measure observed in control populations studied with the two approaches, data from  
101 the two protocols were combined. The imaging data from all subjects was visually inspected  
102 for imaging and movement artifacts. A replacement image set was acquired from subjects in  
103 whom artifacts were found.

#### 104 **Structural MR Imaging**

105 A T1-weighted, 3D MPRAGE image was acquired for every subject. Images acquired at the  
106 University of Pennsylvania were acquired using either Protocol 1: 160 slices,  $1 \times 1 \times 1$  mm,  
107 repetition time (TR) = 1.62 s, echo time (TE) = 3.87 ms, inversion time (TI) = 950 ms, field of  
108 view (FOV) = 250 mm, flip angle =  $15^\circ$ ; or Protocol 2: 160 slices,  $1 \times 1 \times 1$  mm, TR = 1.81 s,  
109 TE = 3.51 ms, TI = 1100 ms, FOV = 250 mm, flip angle =  $9^\circ$ . Images were acquired at Oxford  
110 using: 176 slices,  $1 \times 1 \times 1$  mm, TR = 15 ms, TE = 6 ms.

| Group      | Age / Sex | Blindness onset | Acuity | Cause                                         |
|------------|-----------|-----------------|--------|-----------------------------------------------|
| Congenital | 28 M      | 0               | NLP    | anophthalmia (OTX2 mutation)                  |
| Congenital | 31 F      | 0               | NLP    | Isolated bilateral anophthalmia               |
| Congenital | 18 M      | 0               | NLP    | Isolated bilateral anophthalmia               |
| Congenital | 20 F      | 0               | NLP    | Isolated bilateral anophthalmia               |
| Congenital | 23 M      | 0               | NLP    | Isolated bilateral anophthalmia               |
| Congenital | 25 M      | 0               | NLP    | Isolated bilateral anophthalmia               |
| Congenital | 37 M      | 0               | HM     | ROP                                           |
| Congenital | 59 M      | 0               | NLP    | ROP                                           |
| Congenital | 64 F      | 0               | NLP    | Congenital optic atrophy                      |
| Congenital | 58 M      | 0               | NLP    | ROP                                           |
| Congenital | 33 F      | 0               | LP     | Congenital hypoplasia                         |
| Congenital | 51 M      | 0               | LP     | Cataracts                                     |
| Congenital | 58 F      | 0               | NLP    | ROP                                           |
| Congenital | 54 F      | 0               | NLP    | ROP                                           |
| Congenital | 63 F      | 0               | NLP    | Congenital optic atrophy                      |
| Congenital | 53 F      | 0               | NLP    | ROP                                           |
| Congenital | 62 M      | 0               | LP     | Cataracts, glaucoma                           |
| Congenital | 62 F      | 0               | LP     | ROP                                           |
| Congenital | 56 F      | 0               | NLP    | Retrolental fibroplasia                       |
| Congenital | 69 M      | 0               | NLP    | Glaucoma                                      |
| Congenital | 61 F      | 0               | LP     | Optic atrophy                                 |
| Congenital | 30 F      | 0               | NLP    | Microphthalmia                                |
| Congenital | 32 F      | 0               | NLP    | ROP                                           |
| Congenital | 65 M      | 0               | NLP    | Leber congenital amaurosis                    |
| Congenital | 57 F      | 0               | NLP    | ROP                                           |
| Congenital | 48 F      | 0               | NLP    | ROP, glaucoma, vitreous hemorrhage, cataracts |
| Congenital | 23 F      | 0               | LP     | Congenital cataracts, glaucoma                |
| Congenital | 19 M      | 0               | -      | Leber congenital amaurosis                    |
| Congenital | 23 M      | 0               | -      | Leber congenital amaurosis                    |
| Congenital | 19 F      | 0               | -      | Leber congenital amaurosis                    |
| Congenital | 19 M      | 0               | -      | Leber congenital amaurosis                    |
| Congenital | 23 F      | 0               | -      | Leber congenital amaurosis                    |
| Congenital | 21 F      | 0               | -      | Leber congenital amaurosis                    |
| Congenital | 34 F      | 0               | -      | Leber congenital amaurosis                    |
| Congenital | 52 M      | 0               | -      | Leber congenital amaurosis                    |
| Congenital | 28 F      | 0               | -      | Leber congenital amaurosis                    |
| Congenital | 22 F      | 0               | -      | Leber congenital amaurosis                    |
| Congenital | 20 F      | 0               | -      | Leber congenital amaurosis                    |
| Congenital | 17 M      | 0               | -      | Leber congenital amaurosis                    |
| Congenital | 48 M      | 0               | -      | Leber congenital amaurosis                    |
| Postnatal  | 62 F      | 4               | NLP    | Trauma                                        |
| Postnatal  | 69 F      | 7               | LP     | Cone-Rod Dystrophy                            |
| Postnatal  | 55 F      | 8               | NLP    | Uveitis                                       |
| Postnatal  | 46 F      | 8               | LP     | Retinitis pigmentosa                          |
| Postnatal  | 48 M      | 12              | NLP    | Trauma                                        |
| Postnatal  | 69 F      | 13              | LP     | Juvenile macular degeneration                 |
| Postnatal  | 58 F      | 14              | NLP    | “Eye tumors at birth”                         |
| Postnatal  | 53 M      | 25              | LP     | Ocular infection                              |
| Postnatal  | 59 M      | 28              | NLP    | Diabetic (Type 1) Retinopathy                 |
| Postnatal  | 58 M      | 29              | NLP    | Congenital cataract, retinal detachment       |
| Postnatal  | 72 M      | 35              | LP     | Retinitis pigmentosa                          |
| Postnatal  | 40 M      | 36              | LP     | Glaucoma, cataracts                           |
| Postnatal  | 62 F      | 40              | LP     | Retinitis pigmentosa                          |

Table 1: **Blind subject group details.** Age at blindness onset given in years. ROP - Retinopathy of Prematurity; NLP - No light perception; LP - Light perception; HM - Hand motion perception. Values unavailable for some subjects.

## 111 **Perfusion Imaging**

112 An arterial spin labeled (ASL) perfusion MRI sequence was used to measure resting cerebral  
113 blood flow (CBF) in 47 subjects (16 sighted, 31 blind). These data were acquired using two  
114 different protocols. For Protocol 1, pulsed ASL was collected during a single scan of 8:08 minutes  
115 duration which consisted of 60 label/control pairs with  $3.44 \times 3.44$  mm nominal resolution in  
116 20 axial slices, 4 mm thickness, 1 mm gap using gradient-echo echoplanar imaging with TR  
117 = 4 sec, TE = 17 msec, TI1/TI2 = 700/1900 msec. For Protocol 2, pseudo-continuous ASL  
118 was collected during a single 5:28 minute scan which consisted of 40 label/control pairs with  
119  $2.3 \times 2.3$  mm nominal resolution in 20 axial slices, 5 mm thickness, 1 mm gap using gradient-  
120 echo echoplanar imaging with TR = 4 sec, TE = 60 msec, post-labeling delay time 1200 msec,  
121 and labeling time 1500 msec. Scanning was conducted while subjects rested quietly with eyes  
122 closed in darkness.

## 123 **Diffusion Tensor Imaging**

124 Diffusion tensor imaging (DTI) data were collected for 59 of the subjects (25 sighted, 34 blind).  
125 Each DTI scan constituted a single  $b=0$  volume followed by either 12 ( $b=1000$  s/mm<sup>2</sup>) volumes  
126 or 30 ( $b=1000$  s/mm<sup>2</sup>) volumes at different gradient directions. For the DTI scans with 12  
127 directions, the imaging parameters were: FoV = 220 mm, matrix =  $128 \times 128$ , TR = 8000  
128 msec, TE = 82 msec, 70 slices with thickness 2 mm, interleaved. For the DTI scans with 30  
129 directions, the imaging parameters were: FoV = 220 mm, matrix =  $128 \times 128$ , TR = 6300 msec,  
130 TE = 85 msec, 53 slices with thickness 2.1 mm, interleaved.

131 We note that our diffusion tensor measurements used a relatively small number of directions  
132 to allow reliable estimates of fractional anisotropy using a brief scan. These images are poorly  
133 suited for fiber tracking techniques to define and separate the geniculostriate and commissural  
134 fibers. We therefore used an anatomical region of interest approach to identify the optic radi-  
135 ations and the splenium of the corpus callosum and measured the fractional anisotropy within  
136 this combined region.

## 137 **BOLD Imaging**

138 BOLD fMRI data were collected for 52 subjects (19 sighted, 33 blind) using one of two protocols.  
139 For Protocol 1, echoplanar data were acquired in 45 axial slices with 3 mm isotropic voxels in  
140 an interleaved fashion with  $64 \times 64$  in-plane resolution, field of view=192mm, TR=3000 ms,  
141 TE=30 ms, flip angle 90°, and 64 base resolution. Four scans, two with 100 TRs each, and two  
142 with 150 TRs each, were collected. For Protocol 2, echoplanar data were acquired in 44 axial  
143 slices with 3 mm isotropic voxels in an interleaved fashion with  $64 \times 64$  in-plane resolution, field  
144 of view=192mm, TR=3000 ms, TR=30 ms, flip angle 90°, and 64 base resolution. Two scans  
145 with 150 TRs each, were collected. Scanning was conducted with eyes closed in darkness.

## 146 **Auditory Stimulus for the fMRI Experiment**

147 During BOLD fMRI scanning, participants listened to spoken sentences presented in 30 sec-  
148 ond blocks, interleaved with control blocks consisting of the same sentences played in reverse or  
149 matched white noise. Each stimulus sentence had the structure “The noun is present participle”  
150 or “The noun is adjective”. A total of 150 stimulus sentences were created for the fMRI study,  
151 with 50 from each of three sensory modality categories (tactile, auditory, visual). Thirty-seven  
152 sentences in each category were considered semantically “plausible” and 13 were “implausible”.  
153 The stimuli were selected from a pool of 352 candidate stimulus sentences (88 plausible tactile,  
154 32 implausible tactile, 88 plausible auditory, 27 implausible auditory, 88 plausible visual, and  
155 29 implausible visual). The Kucera-Francis written frequency score of the sentences [26] were  
156 matched between modality categories. Implausible sentences paired nouns with semantically

157 incongruent adjectives or verbs (e.g., “the chair was grunting”). Final selection of the sentences  
158 was based upon normative ratings for plausibility and semantic category assignment of each  
159 candidate stimulus. To obtain these ratings, the candidate stimuli were rated by 20 sighted  
160 control participants (who did not contribute MRI data and are otherwise not included in this  
161 study). In this process, each sentence was visually presented on a testing laptop computer. The  
162 pilot subject judged each sentence as “plausible” or “implausible”, and assigned the sentence to  
163 a sensory category: tactile, auditory, or visual. The 352 candidate sentences were presented in  
164 random sequence. We selected the stimulus sentences which received the highest consensus rat-  
165 ings for sensory category and plausibility. The complete list of stimulus sentences may be found  
166 online (<https://cfn.upenn.edu/aguirre/wiki/public>). The stimulus sentences were recorded us-  
167 ing Microsoft Sound Recorder v 5.1 (PCM 22.06KHz, 16 bit, mono). All sentences were spoken  
168 in the same female voice. Each sentence was spoken in slightly less than 3 seconds. We used  
169 WavePad v.3.05 (NCH Swift Sound) to normalize each stimulus to the maximum auditory level  
170 and apply auto-spectral subtraction to voice. Fifty control stimuli were created by reversing  
171 the sentences in time. An additional, white noise stimulus was created. During the fMRI scans,  
172 10 stimuli were presented in 30 second blocks with the order of blocks varied across subjects.  
173 Subjects made a button-press for each sentence that was semantically implausible, as well as  
174 for the first reverse and white-noise control stimulus in each block.

175 In Protocol 1, sentences from different sensory modalities were played together in a 30  
176 second block. In Protocol 2, sentences from different sensory modalities were intermixed in  
177 blocks. Protocol 2 also presented fewer total auditory blocks.

## 178 **Image pre-processing**

### 179 **Structural MR Imaging**

180 The FreeSurfer (v5.1) toolkit (<http://surfer.nmr.mgh.harvard.edu/>) [27–30] was used to pro-  
181 cess anatomical MPRAGE images from the subjects to construct white matter, pial, inflated,  
182 and spherical brain surfaces. Briefly, this processing includes spatial inhomogeneity correction,  
183 non-linear noise-reduction, skull-stripping [31], subcortical segmentation [32, 33], intensity nor-  
184 malization [34], surface generation [27, 28, 35], topology correction [36, 37], surface inflation  
185 [28], registration to a spherical atlas [29] and thickness calculation [30]. This approach matches  
186 morphologically homologous cortical areas based on the cortical folding patterns with minimal  
187 metric distortion and allows sampling at subvoxel resolution and detection of cortical thickness  
188 differences at the sub-millimeter level. Cortical thickness was estimated at each point across  
189 the cortical mantle by calculating the distance between the gray/white matter boundary and  
190 the cortical surface.

### 191 **Perfusion Imaging**

192 Image data processing and analyses were carried out with custom routines developed in Inter-  
193 active Data Language (<http://www.exelisvis.com/ProductsServices/IDL.aspx>), which was used  
194 to quantify CBF values and reconstruct CBF maps for perfusion analyses (part of the ASLTool-  
195 box [38] (<https://cfn.upenn.edu/zewang/ASLtbx.php>). For each participant in Protocol 1 and 2,  
196 echoplanar images were first realigned to correct for head motion. The perfusion-weighted im-  
197 age series was then generated by pair-wise subtraction of the label and control images, followed  
198 by conversion to an absolute cerebral blood flow image series (ml/100g/min) based on either  
199 a PASL perfusion model assuming a blood T1 of 1.5s at 3T for Protocol 1 data or a single-  
200 compartment CASL perfusion model for Protocol 2 data [39]. A single mean CBF image was  
201 generated for each subject and co-registered to the MPRAGE image for that subject. The CBF  
202 value at each voxel was then scaled by the global mean of the CBF image.

---

## 203 Fractional Anisotropy

204 Each diffusion-weighted volume was skull-stripped and co-registered to the first  $b=0$  volume  
205 using a rigid affine transformation to correct for distortion caused by eddy-current effects and  
206 simple head motion using FMRIB's software library and diffusion toolbox v2.0 (FSL, freely  
207 available at <http://www.fmrib.ox.ac.uk/fsl/>). The diffusion tensor of each voxel was calculated  
208 by a linear least-squares fitting algorithm [40]. After rendering the diffusion tensor along the  
209 diagonal, the three diffusion tensor eigenvalues were obtained (mean diffusivity, axial diffusivity,  
210 and radial diffusivity). Fractional anisotropy (FA) of each voxel was derived based on the three  
211 eigenvalues. The FA was used as a measure of the degree of diffusion anisotropy. FA varies  
212 between 0, representing isotropic diffusion, and 1, in the case of the diffusion restricted to a  
213 single direction. The individual diffusion-weighted images from each subject were co-registered  
214 to subject specific anatomy in FreeSurfer using FSL-FLIRT with 6 degrees-of-freedom under  
215 a FreeSurfer wrapper (*bbregister*). The resulting registration matrices were used to transform  
216 the FA maps to FreeSurfer anatomical space and also to transform regions of interest (ROI)  
217 estimated in FreeSurfer space to subject-specific diffusion space.

## 218 BOLD Imaging

219 Data were sinc interpolated in time to correct for slice acquisition sequence, motion-corrected  
220 with a six parameter, least-squares, rigid body realignment using the first functional image as  
221 a reference and co-registered to the anatomical image. The fMRI data were smoothed in space  
222 with a 0.3 voxel full-width at half-maximum isotropic Gaussian kernel. Covariates of interest  
223 were modeled as a simple boxcar and convolved with a standard hemodynamic response function  
224 [41]. Covariates of no interest included global signal and "spikes". The latter were identified by  
225 automated analysis (time points with excursions of greater than 3 standard deviations from the  
226 mean) and visual inspection and then modeled as impulses. The beta effect for each covariate  
227 (expressed as percentage signal change) was derived at each voxel. The echoplanar data in  
228 subject space were co-registered to subject specific anatomy in FreeSurfer using FSL-FLIRT  
229 with 6 degrees-of-freedom under a FreeSurfer wrapper (*bbregister*). This co-registration step  
230 allows volumetric data from each subject to be mapped to the subjects left and right hemispheric  
231 surfaces. The volumetric beta maps of percentage signal response to "Sentences vs White Noise"  
232 and "Sentences vs. Reverse" were derived from each subject and then projected to the subjects  
233 cortical surface.

## 234 Regions of interest

235 A set of cortical and subcortical regions along the visual pathway were defined using automated  
236 methods, and subjected to visual inspection and manual correction of any errors in segmenta-  
237 tion. The boundary of primary visual cortex was defined for each subject by anatomical features  
238 of the cortical surface using FreeSurfer [42, 43]. The V1 region of interest in the native surface  
239 space for the subject was mapped onto the volumetric space for that subject and a binary vol-  
240 umetric mask was created. The pericalcarine white matter region consists of the white matter  
241 voxels that underlay primary visual cortex. This region was demarcated automatically in the  
242 native anatomical space for each subject using the Destrieux 2009 atlas segmentations [44]. The  
243 optic chiasm was identified through automated subcortical segmentation using FreeSurfer [33].

244 The splenium and forceps of the posterior part of corpus callosum were defined as a con-  
245 joint region. The FreeSurfer segmentation routine divides the corpus callosum into 5 equally  
246 spaced ROIs along the anterior-posterior axis; the splenium was defined in each subject as  
247 the most posterior ROI. Independently, the splenium of the corpus callosum in Montreal Neu-  
248 rologic Institute (MNI) space was identified using the Johns Hopkins University, DTI-based  
249 white-matter atlases [45, 46]. The splenium in MNI space technically consists of the sple-



250 nium and forceps. This ROI in MNI space was warped back to individual subject anatomical  
251 space in FreeSurfer using diffeomorphic warping in the Advanced Normalization Tools (ANTs)  
252 (<http://stnava.github.io/ANTs/>). The union of these two regions was obtained and binarized  
253 to produce a unified region. Visual inspection was conducted for each subject to remove any  
254 voxels from the segmentation that might overlap with gray matter or the ventricles. The optic  
255 radiations were identified in MNI space using the Jülich histological atlas [47–49] and warped  
256 to individual subject space in FreeSurfer using diffeomorphic warping in ANTs. Any non-white  
257 matter voxels were removed by visual inspection. A lateral geniculate nucleus (LGN) ROI was  
258 defined within MNI space using the Jülich atlas [47–49].

259 A parallel set of regions were defined along the auditory pathway for a control analysis. The  
260 transverse temporal gyrus region (corresponding to primary auditory cortex) was demarcated  
261 automatically in the native anatomical space for each subject using the Destrieux 2009 atlas  
262 segmentation [44]. The transverse temporal white matter region consists of the white matter  
263 voxels that underlay transverse temporal gyrus. This region was demarcated automatically in  
264 the native anatomical space for each subject using the Destrieux 2009 atlas segmentation [44].  
265 A medial geniculate nucleus (MGN) ROI was defined within MNI space using the Jülich atlas  
266 [47–49].

## 267 Calculation of measures

268 Cortical thickness for a region was estimated separately for the left and right hemisphere us-  
269 ing FreeSurfer, as was whole brain cortical thickness. The whole brain measure was used to  
270 adjust local thickness measures to account for differences in overall cortical thickness between  
271 individuals.

272 Cortical surface area for a region was defined as the sum of the area ( $\text{mm}^2$ ) enclosed by all  
273 vertices comprising the region at the gray-white matter boundary. Whole brain surface area  
274 was estimated for the left and right hemisphere using FreeSurfer. The whole brain measure  
275 was used to adjust local surface area measures to account for differences in overall surface area  
276 between individuals.

277 Volumes for the left and right pericalcarine white matter, transverse temporal white matter,  
278 and optic chiasm were estimated using FreeSurfer. Supra-tentorial volume was also measured  
279 and included the entire sub-pial intra-cranial volume excluding the cerebellum and brain stem.  
280 This measure was used to adjust volumetric measures to account for differences in overall brain  
281 size between individuals. Intracranial volume was also obtained and reflects the volume of all  
282 tissue (gray, white, and CSF) within the skull. This measure was also used to adjust volumetric  
283 measures to account for differences in overall brain size between individuals.

284 The lateral geniculate nucleus and medial geniculate nucleus volumes were estimated using  
285 Tensor Based Morphometry (TBM). TBM calculates the Jacobian determinant for each voxel  
286 of the deformation field that relates an individual brain to the common template brain in MNI  
287 space, thus providing a measure of tissue growth or shrinkage for each voxel of the brain [50].  
288 TBM is calculated directly from the deformation field relating all the voxels of the individual  
289 brain to the target brain in standard MNI space [51]. The mean Jacobian determinant of the  
290 deformation field was extracted for the LGN and MGN ROIs. This indirect index (as opposed  
291 to direct volumetric measurement) was used as there are no clear anatomical boundaries that  
292 define the LGN and MGN within a T1 image.

293 Scaled mean CBF (mean CBF/global CBF) under resting conditions was extracted from  
294 the combined left and right hemisphere V1 ROI.

295 The percent signal change for the contrast of “sentences vs white noise” and “reverse sen-  
296 tences vs. white noise” was derived for each subject from primary visual cortex.

297 The mean FA value in the splenium and optic radiations was obtained from the combination  
298 of these regions of interest in each subject. Derivation of the FA value from this combined region

299 of interest obviated the need to segment the tracks attributable to the forceps of the splenium  
300 and the optic radiations.

### 301 **Reconciliation of Oxford and University of Pennsylvania data**

302 MPRAGE images were acquired from 26 sighted controls at the Oxford site (16 men, 10 women,  
303 mean age  $27 \pm 5$  SD); data from these sighted controls at Oxford were used only for this adjust-  
304 ment between imaging sites and were not otherwise included in the study. Age and gender  
305 matched sighted controls at the University of Pennsylvania site were identified within the en-  
306 tire set of 59 sighted control subjects (16 men, 10 women, mean age  $27 \pm 5$  SD). The set of 8  
307 anatomical measures were derived from the MPRAGE images from both cohorts. The mean of  
308 each measure in the Oxford controls was then compared to the mean of each measure in the  
309 matched University of Pennsylvania sighted controls. The measures from the anophthalmic sub-  
310 jects studied at Oxford were then adjusted by this mean difference. This correction accounted  
311 for any small, consistent difference in the measures that might be attributed to the difference  
312 in pulse sequence or head coil between the sites. The absolute size of these adjustments was on  
313 the order of 1-2% of the mean measurement, and in all cases less than 6%. The size of these  
314 adjustments were between 3 and 30 times smaller than the mean difference in measurement size  
315 between the blind and sighted populations we observe.

### 316 **Reconciliation of Protocol 1 and 2 data from the University of Pennsylvania**

317 Data were collected at the University of Pennsylvania under two slightly different protocols.  
318 Using unpaired t-tests, we examined if protocol differences were associated with differences in  
319 the mean of measures obtained in the sighted control group. There was no significant difference  
320 in the eight anatomical measures derived from the MPRAGE images in the control group  
321 between the two protocols [ $t(57)$ , all p values  $> 0.18$ ].

322 This comparison was conducted as well for the measures derived from perfusion, DTI, and  
323 BOLD fMRI. The V1 CBF measure (after scaling by global CBF) did not differ between the  
324 control subjects studied under Protocol 1 and Protocol 2 [ $t(14) = 1.69$ ,  $p = 0.11$ ].

325 No difference in the control subjects was found between the two DTI protocols for the  
326 average FA of splenium and optic radiations [ $t(23) = -0.69$ ,  $p = 0.49$ ].

327 The average BOLD fMRI response in V1 did not differ in control subjects between the data  
328 collected under Protocol 1 and Protocol 2 [ $t(17) = 0.31$ ,  $p = 0.76$ ].

329 Given the absence of measurable differences, we combined the data from the two protocols  
330 in subsequent analyses.

### 331 **Adjustment of anatomical measures for age, gender, and overall size effects**

332 Each of the 8 anatomical measures were adjusted for the effects of age, gender, and variations  
333 in overall brain size within a general linear model. First, the data from all subjects (blind and  
334 sighted) were combined. Covariates were created that reflected gender, age, and a quadratic and  
335 cubic polynomial expansion of age. A covariate that modeled the effect of data being collected  
336 from Protocol 1 or Protocol 2 was also included to ensure that no main effect of this factor  
337 could influence the subsequent analyses.

338 Covariates were also included to capture overall scaling effects of brain size. For measures of  
339 cortical thickness, this covariate was the mean global cerebral cortical thickness. For measures  
340 of surface area, this covariate was total cerebral surface area. For measures of volume, a measure  
341 of total supratentorial volume and a measure of total intracranial volume was included. Each  
342 of these size measures were also expanded to reflect quadratic and cubic effects of the variable.  
343 After fitting, the residual data from this model was taken as the adjusted measure. For every  
344 measure, significant variance was accounted for by the linear effect of a size covariate; there

345 was also a quadratic effect of intracranial volume on the size of the optic chiasm. Gender and  
346 age (and the polynomial expansion of age) did not independently explain significant variance in  
347 the measures, with the exception of a modest quadratic effect of age upon left hemisphere V1  
348 surface area, and a cubic effect of age upon left hemisphere pericalcarine volume.

349 We next tested if there are further effects in the data that manifest as an interaction of  
350 group (blind or sighted) with adjustment factor (age, gender, overall size). We modeled these  
351 interaction terms (and their cubic and quadratic polynomial expansions) and found that they  
352 did not explain significant variance in the data for any of the 8 measures (all  $p > 0.15$ ). Therefore,  
353 the data were not adjusted for these interaction effects.

### 354 Hierarchical clustering analysis

355 We conducted a data reduction step to combine the 8 anatomical measures derived from the  
356 MPRAGE images into fewer dimensions. The set of measures from the sighted and blind  
357 subjects were combined, and the average effect of group (blind or sighted) was removed from  
358 each measure. The measures were then z-transformed by dividing each observed value by the  
359 standard deviation of a given measurement across the population. The  $112 \times 8$  matrix (subjects  
360  $\times$  measures) was submitted to the MATLAB hierarchical clustering analysis routines of *pdist*  
361 and *linkage*, using a Euclidean distance metric and Ward's minimum variance criterion for  
362 clustering. The ability of the resulting dendrogram to model the pair-wise distances in the data  
363 was evaluated by calculating the cophenetic correlation coefficient using the MATLAB function  
364 *cophenet*.

365 The reliability of the assignment of anatomical measures to clusters was examined with  
366 a bootstrap re-sampling analysis. The set of blind (or sighted) subjects was sampled with  
367 replacement and the cluster analysis repeated. We measured the proportion of the 1000 re-  
368 samples for which the same anatomical measures were assigned to a given cluster.

|   | Measure [units]                              | mean $\pm$ SD Sighted | mean $\pm$ SD Blind | Cohen's <i>d</i> |
|---|----------------------------------------------|-----------------------|---------------------|------------------|
| 1 | LH V1 cortical thickness [mm]                | 1.64 $\pm$ 0.09       | 1.76 $\pm$ 0.20     | -0.8             |
| 2 | RH V1 cortical thickness [mm]                | 1.69 $\pm$ 0.10       | 1.75 $\pm$ 0.16     | -0.4             |
| 3 | LH V1 surface area [mm <sup>2</sup> ]        | 2529 $\pm$ 298        | 2183 $\pm$ 325      | 1.1              |
| 4 | RH V1 surface area [mm <sup>2</sup> ]        | 2382 $\pm$ 355        | 2007 $\pm$ 292      | 1.2              |
| 5 | LH Pericalcarine volume [mm <sup>3</sup> ]   | 3302 $\pm$ 578        | 2623 $\pm$ 592      | 1.1              |
| 6 | RH Pericalcarine volume [mm <sup>3</sup> ]   | 3332 $\pm$ 562        | 2576 $\pm$ 623      | 1.2              |
| 7 | Optic chiasm volume [mm <sup>3</sup> ]       | 250 $\pm$ 69          | 178 $\pm$ 60        | 1.1              |
| 8 | LGN volume [log Jacobian]                    | 0.94 $\pm$ 0.12       | 0.78 $\pm$ 0.13     | 1.3              |
|   | Whole brain cortical thickness [mm]          | 2.53 $\pm$ 0.13       | 2.53 $\pm$ 0.13     | 0.00             |
|   | Cerebral surface area [meters <sup>3</sup> ] | 0.18 $\pm$ 0.02       | 0.17 $\pm$ 0.02     | 0.08             |
|   | Supratentorial volume [liters]               | 1.02 $\pm$ 0.11       | 1.00 $\pm$ 0.13     | 0.04             |
|   | Intracranial volume [liters]                 | 1.35 $\pm$ 0.28       | 1.25 $\pm$ 0.27     | 0.09             |

Table 2: **Mean group differences in the anatomical measures.** The anatomical measurements for each group are given, after adjustment for individual differences in brain size and removal of age and gender effects. The Cohen's *d* is the difference in means relative to the standard deviations. LH - Left Hemisphere; RH - Right Hemisphere; V1 - Primary Visual Cortex; LGN - Lateral Geniculate Nucleus.

## 369 Results

### 370 Mean differences in visual pathway anatomy between the blind and the sighted

371 Measures of visual pathway anatomy (Fig 1A) were derived from an MPRAGE image of the  
372 brain for 59 sighted and 53 blind subjects. The measures were adjusted to remove the effect  
373 of individual variation in overall brain size and surface area, and the effects of variation in age  
374 and gender. Separate measures of left and right cortical structures were obtained as the effects  
375 of blindness can be lateralized (Voss and Zatorre, 2011).

376 As would be expected from many prior studies, there were highly significant and substantial  
377 differences between the blind and sighted groups in the mean of each measure (Table 2). The  
378 relative area and volume of anatomical structures along the visual pathway are greater in  
379 the sighted, with the exception of the thickness of the gray matter layer of V1 cortex which  
380 is increased in the blind. In unpaired t-tests (110 df) between the groups, these differences  
381 were all significant at the  $p=0.00025$  level or lower, with the exception of the difference in V1  
382 cortical thickness in the right hemisphere, which had an associated p-value of 0.027. Table 2  
383 also presents the Cohen's *d* score for these group comparisons, indicating the size of the group  
384 difference relative to the standard deviation across individuals.

385 The effect of individual variation in overall brain size was removed from the measures. We  
386 nonetheless checked if substantial differences in these whole-brain measures exist between the  
387 two groups. The lower portion of Table 2 provides the group means for each of the whole-brain  
388 indices used to adjust the local visual pathway measures. The differences between groups were  
389 small relative to individual variation, as indicated by the Cohen's *d* scores which were all less  
390 than 0.1.

391 We considered the possibility that the effects we find along the visual pathway reflect general  
392 mechanisms of brain development that are altered in a non-specific way in our blind popula-  
393 tions. We repeated our analyses using seven analogous anatomical measures from the auditory  
394 pathway. We found minimal difference between the blind and sighted groups for the seven  
395 measures (Cohen's *d* for all measures between 0 and 0.4), supporting the anatomical specificity  
396 of our primary findings.

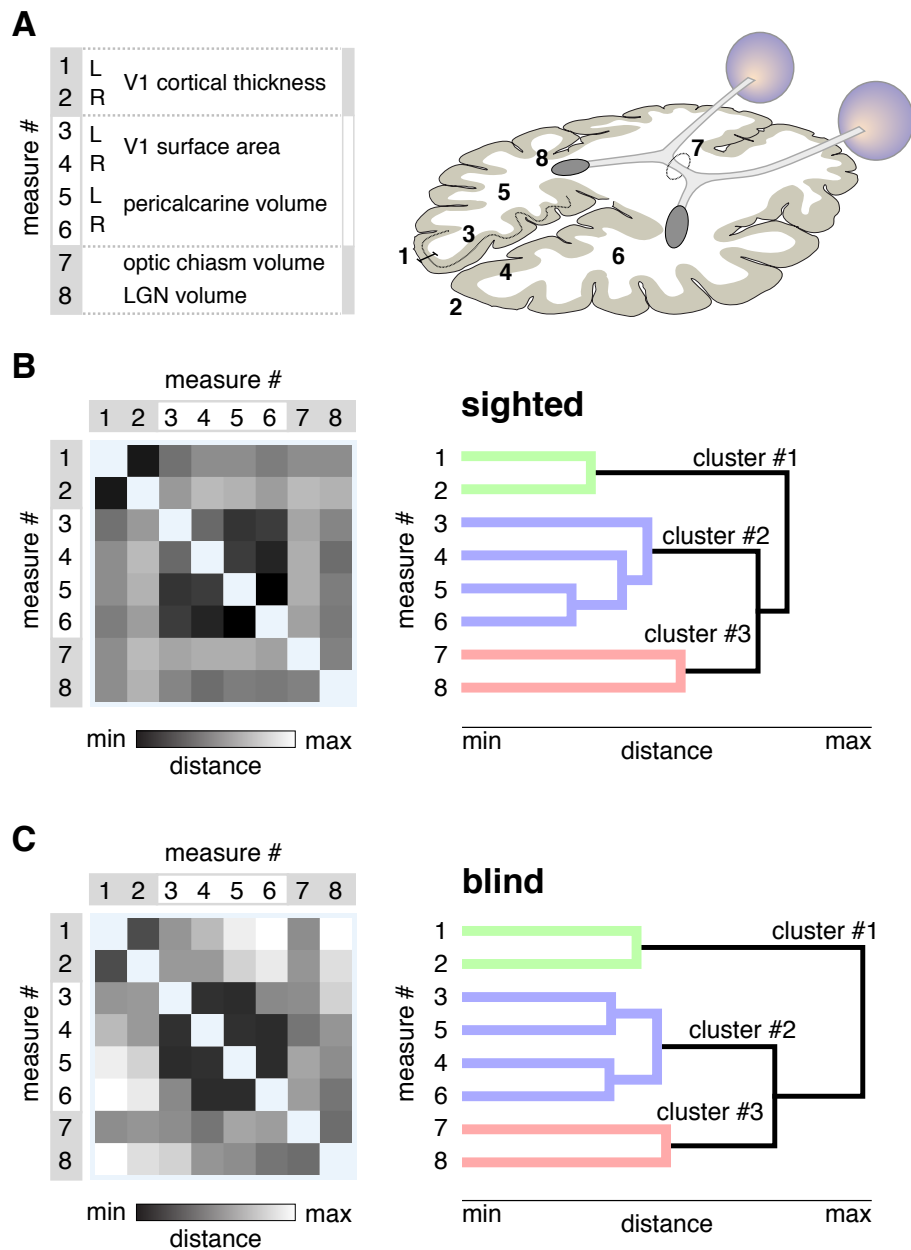

Figure 1: **Patterns of shared variation in visual pathway anatomy.** (A) The eight measures of visual pathway anatomy are illustrated on an axial schematic of the human brain. The groupings of the measures are to assist subsequent interpretation of the data. (B) The Euclidean distance matrix and dendrogram for the 8 measures across the sighted population. *Left.* The square-root, sum-squared difference in values between two measures across subjects provides a measure of Euclidean distance. Darker shades indicate pairings of measures that have similar variation across subjects, and thus lower distance values. *Right.* The distance matrix was subjected to hierarchical clustering, yielding a dendrogram. The length of each branch reflects the distance between the paired measures. The three primary clusters of anatomical variation are colored green, blue, and red. (C) *Left.* The distance matrix across the 8 measures for the blind population. A similar overall structure is seen as compared to the sighted. *Right.* The dendrogram derived from measures from the blind subjects. The same overall cluster structure is seen. Note that there is some rearrangement in the measurements assigned to cluster #2 in the blind as compared to the sighted.

## 397 Correlated anatomical variation in visual pathway anatomy

398 While there is significant separation in the group mean of measures of visual pathway anatomy,  
399 there is also broad variation about the means within each group. This individual variation  
400 within a group (blind or sighted) is roughly equal to the size of the difference between groups,  
401 as indicated by Cohen's  $d$  scores that are close to one.

402 This variation cannot be attributed to the effects of gender, age, or individual differences in  
403 overall brain size or cortical thickness, as these effects were modeled and removed from the data.  
404 We confirmed that the variation is not the simply the result of measurement noise. We collected  
405 an MPRAGE brain image from an additional thirteen, normally sighted subjects (not otherwise  
406 included in the study) on two occasions between 7 and 194 days apart. We derived the eight  
407 measures of visual pathway anatomy and compared the measures obtained on the two occasions.  
408 Across the subjects, individual variation in the measures was strongly correlated across the two  
409 imaging sessions (Pearson correlation values between the first and second measurement session  
410  $>0.77$  for all measures, and  $>0.90$  for six of the eight measures).

411 As this variation seems likely to reflect true individual differences, we next asked if there  
412 are consistent patterns of variation in the relative size of visual pathway components across  
413 individuals. For example, in previous studies of normally sighted people, occipital lobe surface  
414 area and volume were found to be correlated, but relatively independent of V1 cortical thickness  
415 [17]. We examined this first in data from the sighted subjects. The set of 8 measurements from  
416 59 sighted people was submitted to a hierarchical clustering analysis. The resulting Euclidean  
417 distance matrix and dendrogram shows the structure of correlation across subjects in variation  
418 in the anatomical measures, and the clustering of measures into covarying groups (Fig 1B). This  
419 dendrogram had high explanatory power in the data, with a cophenetic correlation coefficient  
420 of 0.88 (the maximum possible being 1.0).

421 The dendrogram identifies three primary clusters of anatomical variation across subjects.  
422 Similar to prior findings [17], cortical thickness in left and right V1 are highly correlated. This  
423 first cluster is relatively independent from a second cluster, composed of the surface area and  
424 volume of the left and right V1 cortex and pericalcarine white matter. The size of the optic  
425 chiasm and lateral geniculate nucleus form a third and final cluster. These clusters of measures  
426 were a stable property of the data. We conducted a bootstrap analysis of the data, and found  
427 the same anatomical measures were assigned to the first, second, and third clusters in 99, 98,  
428 and 79% of the re-samples, respectively.

429 We next asked if the same pattern of visual pathway variation is found in the population of  
430 blind subjects. It is possible that blindness would cause some anatomical structures that are  
431 normally independent to become correlated, perhaps through a shared mechanism of atrophic  
432 change. Instead, a notably similar clustering of anatomical variation was found in the blind as  
433 was seen in the sighted (Fig 1C). This structure was a stable property of the data (cophenetic  
434 correlation = 0.82; replicability of clusters 1, 2, and 3 was 100, 99, and 70%, respectively).

435 These findings indicate that there are consistent patterns of individual variation in brain  
436 structures along the visual pathway, and that the form of this variation is highly similar in the  
437 sighted and blind. The clustering of anatomical variation also indicates that the set of 8 measures  
438 can be combined into three composite measures. As the units differ substantially between the  
439 measures, we z-transformed each measure across the blind and sighted population, so that the  
440 mean value across the blind and sighted subjects combined is zero, with positive values being  
441 typical of sighted subjects and negative values typical of blind subjects. In this representation  
442 of the data, the measurement of V1 cortical *thickness* is reversed to become a measurement of  
443 relative *thinness*, with a thinner cortex being more typical of the sighted population. We then  
444 averaged the z-transformed measures in each of the three clusters, allowing us to summarize  
445 visual pathway anatomy for each subject with a set of three values, one for each cluster (Fig 2).

446 As would be expected, the mean value for each cluster differed significantly between the blind  
447 and the sighted population (unpaired t-test, cluster 1:  $p=0.0013$ ; cluster 2:  $p < 0.00001$ ; cluster

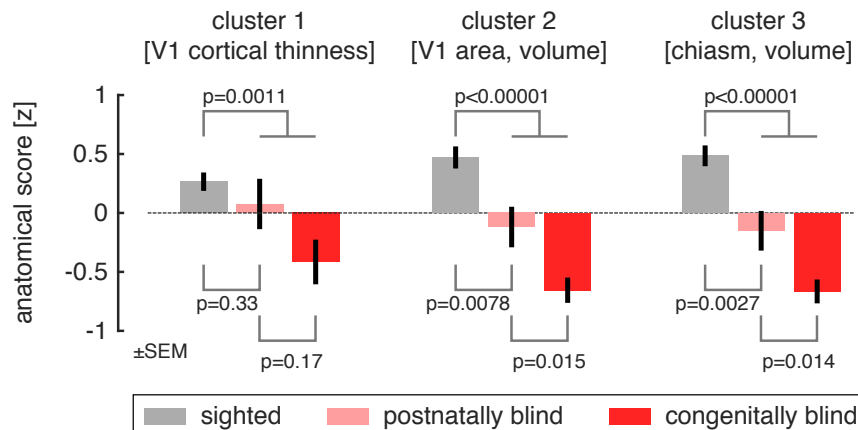

Figure 2: **Group differences in anatomy, organized by cluster.** Each anatomical size measurement was transformed to a mean-centered z-score and then averaged within a cluster. The sign of values in cluster 1 was reversed, so that positive values represent *thinner* V1 cortex. Anatomical scores within each cluster were then averaged within subject groups, corresponding to the normally sighted, postnatally blind, and congenitally blind. Across all three clusters, a graded change in the anatomical scores is seen for these subject groupings, although the difference between postnatally and congenitally blind is not significant for cortical thinness (cluster 1).

448 3:  $p < 0.00001$ ). We then considered how heterogeneity in our population of blind subjects might  
449 be related to these anatomical measures. At a coarse level, the blind population (Table 1) can  
450 be divided into those with vision loss at birth (congenital), and those who developed vision loss  
451 after birth (postnatal). It is possible, for example, that anatomical variation could be established  
452 in utero, with no role for post-natal input upon relative size. If this were the case, the relative  
453 size of a cluster of anatomical structures would not differ between the sighted and postnatally  
454 blind. We examined the anatomical score within each cluster for the sighted, congenitally blind,  
455 and postnatally blind. For all three clusters of visual pathway anatomy, measurements from the  
456 postnatally blind were intermediate to those from the congenitally blind and sighted, although  
457 these differences were significant only for the second and third clusters.

458 Given these findings, one might consider the possibility that the degree of visual pathway  
459 alteration is related to the age at which vision was lost. While an appealing idea in principle, it is  
460 difficult to test in practice as many causes of blindness in our cohort are progressive, preventing  
461 the identification of a clear age of onset. Nonetheless, we identified 13 subjects with a discreet  
462 timing of postnatal onset of blindness. We did not find a significant Spearman's rank correlation  
463 between the reported age of blindness onset and either the eight anatomical measures, or their  
464 grouping into three clusters (all p-values  $> 0.17$ ).

### 465 Group differences in white matter coherence and cross-modal responses

466 Given our finding of independent patterns of anatomical variation in the sighted and the blind,  
467 we next explored if these clusters of variation are differentially related to other structural and  
468 functional imaging measures. About half of our blind and sighted subjects contributed addi-  
469 tional MRI measurements. We first tested for group (blind vs. sighted) differences in measure-  
470 ments of cerebral blood flow, cross-modal response, and white matter fractional anisotropy.

471 We obtained a measure of resting-state (eyes closed, darkness) cerebral blood flow within  
472 primary visual cortex using arterial spin-labeled MRI. Prior studies have found an increase

473 in resting functional activity in the visual cortex of the blind as compared to the sighted (as  
474 reflected in resting glucose utilization [52]). We did not find a difference in V1 CBF between the  
475 blind and sighted groups [mean relative V1 CBF in the sighted: 1.20, and blind: 1.15; unpaired  
476 t-test (45 df) = 0.50,  $p = 0.62$ ]. We tested for a difference between the congenitally and  
477 postnatally blind, as a prior study of glucose utilization had found opposite effects upon resting  
478 metabolic activity depending upon the timing of blindness [53], but did not find a significant  
479 difference [mean relative V1 CBF in the congenitally blind: 1.02, and postnatally blind: 1.22;  
480 unpaired t-test (29 df) =  $-1.48$ ,  $p = 0.15$ ]. As there was no group difference in this measure,  
481 we do not further consider it here.

482 Our subjects also underwent functional MRI scanning. Blood oxygen level dependent  
483 (BOLD) fMRI was used to measure cross-modal neural responses evoked within striate cortex  
484 during an auditory semantic judgment task. Measurements from primary visual cortex  
485 were obtained while subjects listened to sentences played forwards and sentences played in re-  
486 verse, as compared to listening to white noise. In agreement with multiple prior studies, we  
487 found a greater response to these stimuli in the blind subjects as compared to the sighted [mean  
488 % BOLD signal change in the sighted: 0.89, and blind: 2.25; unpaired t-test (50 df) =  $-2.03$ ,  $p$   
489 = 0.048]. There was no significant difference in response between the congenitally blind as com-  
490 pared to the postnatally blind [ $t(31) = -1.40$ ,  $p = 0.17$ ]. We also tested for group effects in the  
491 differential V1 response evoked by forward as compared to reverse sentences, reflecting seman-  
492 tic content while controlling for low level auditory features. There was no significant difference  
493 between the groups in this measure [mean % BOLD signal change difference between forward  
494 and reverse sentences in the sighted: 0.59, and blind: 1.22; unpaired t-test (50 df) =  $-1.22$ ,  $p =$   
495 0.26]. In analyses described below, we examine the relationship between cross-modal response  
496 and individual differences in anatomy. As the group difference for cross-modal response was  
497 largest for all auditory stimuli (forwards and reverse speech combined), we focused upon this  
498 measure in subsequent tests.

499 Finally, we obtained diffusion tensor imaging (DTI) measures of the fractional anisotropy  
500 (FA) of the optic radiations and splenium of the corpus callosum. FA values were significantly  
501 reduced in these white matter components of the central visual pathway in the blind as compared  
502 to the sighted [mean FA value in the sighted: 0.48, and blind: 0.44; unpaired t-test (57 df) =  
503 3.29,  $p = 0.0017$ ]. This measure was not different between the congenitally and postnatally  
504 blind groups [ $t(32) = 1.10$ ,  $p = 0.28$ ]. We may have lacked the statistical power needed to  
505 replicate prior findings of a difference in these subgroups [54].

## 506 **Anatomical size variation is related to white matter coherence and cross-** 507 **modal responses**

508 We observed earlier that individual differences in the size of structures along the visual pathway  
509 can be grouped into three primary clusters of variation, and that this clustering is similar in  
510 the sighted and blind groups. We next asked if anatomical size variation is related to individual  
511 differences in cross-modal responses and white matter organization in the blind and sighted. The  
512 average score for each of the three anatomical clusters was obtained for each subject. Within a  
513 linear model, we then tested if the anatomical scores could be used to predict either cross-modal  
514 responses or fractional anisotropy measures.

515 Anatomical variation was significantly related to the degree of cross-modal response within  
516 area V1 across subjects [ $F(3,54) = 9.54$ ,  $p = 0.00028$ ] (Fig 3A). We examined the weights on the  
517 model (Fig 3B), and found that the relationship between visual pathway anatomy and cross-  
518 modal BOLD fMRI response is mediated primarily by cortical thickness. Across subjects, the  
519 thicker V1 cortex, the greater the cross-modal response. The two other clusters of anatomical  
520 variation were not significantly related to cross-modal activity.

521 Anatomical variation in the visual pathway was also significantly related to the fractional  
522 anisotropy measured from the optic radiations and splenium [ $F(3,56) = 4.45$ ,  $p = 0.016$ ] (Fig



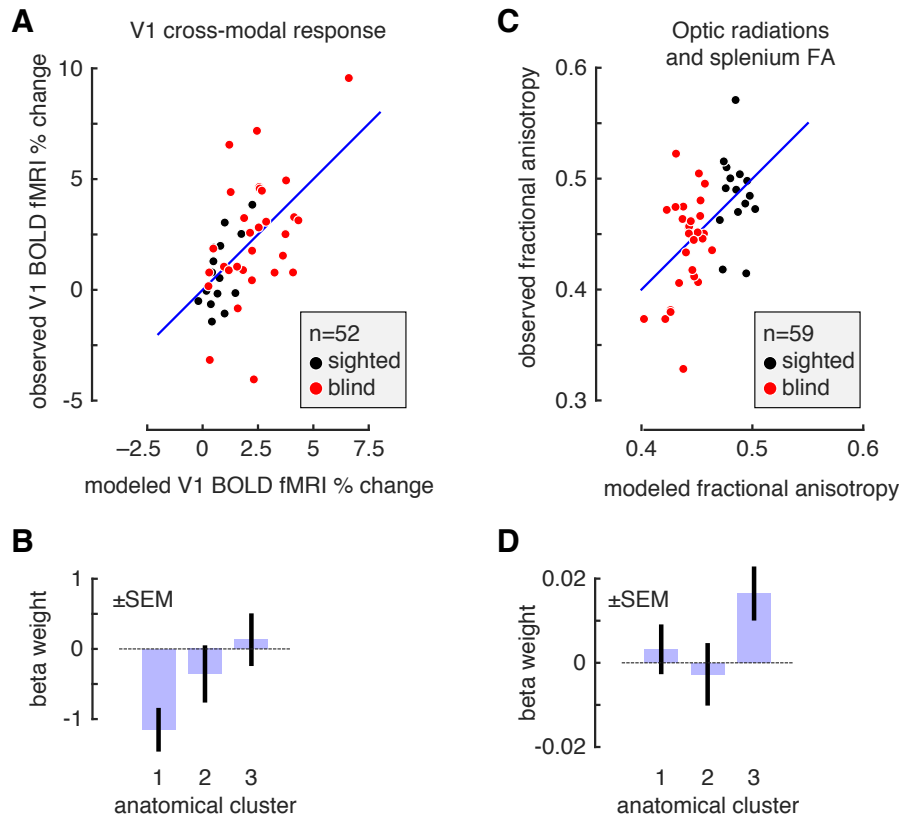

**Figure 3: Relation of clustered anatomical variation to cross-modal response and fractional anisotropy.** (A) For each of 52 subjects (blind and sighted), we obtained the BOLD fMRI response in V1 while subjects listened to auditory sentences played forwards and in reverse, as compared to white noise. We modeled the ability of individual variation in the three anatomical clusters to account for variation in cross-modal BOLD fMRI response. For each subject, the x-axis gives the prediction of the model for BOLD fMRI response, and the y-axis the observed response. The entire model fit the data above chance ( $p=0.00028$ ). (B) Model weights for the fit to the cross-modal response data. Shown are the mean and standard error of weights upon each of the clusters of anatomical variation in their prediction of V1 BOLD fMRI response. Only the first cluster of anatomical variation (V1 cortical *thinness*) had a fitting weight significantly different from zero. The loading on this weight is negative, indicating that *thicker* V1 cortex predicts greater cross-modal responses. (C) For each of 59 subjects, we measured fractional anisotropy within the optic radiations and splenium of the corpus callosum. We modeled the ability of individual variation in the three anatomical clusters to account for variation in FA. For each subject, the x-axis gives the prediction of the model for FA, and the y-axis the observed measure. The entire model fits the data above chance ( $p=0.016$ ). (D) Model weights for the fit to the FA data. Shown are the mean and standard error of weights upon each of the clusters of anatomical variation in their prediction of the FA measure. Only the third cluster of anatomical variation (chiasm and LGN volume) had a fitting weight significantly different from zero.

523 3C). In this case, it was variation in the third anatomical cluster—reflecting the relative size  
524 of the optic chiasm and lateral geniculate nucleus—that was related to fractional anisotropy of  
525 the visual pathway (Fig 3D). The larger the optic chiasm and lateral geniculate nucleus, the  
526 higher the FA score measured in the optic radiations and splenium.

527 These correlations are driven in part by group effects. That is, both the anatomical size  
528 measures, and the measures of cross-modal activity and fractional anisotropy, share variance  
529 that is explained as simply having different mean scores for blind and sighted subjects. This  
530 shared group effect, however, would not account for the different relationships observed between  
531 the first cluster of variation and cross modal activity on one hand, and between the third cluster  
532 of variation and fractional anisotropy on the other. Nonetheless, we examined if anatomical  
533 variation along the visual pathway could predict cross-modal activity and fractional anisotropy  
534 independently of group effects. After modeling and removing the group (blind vs. sighted) effect,  
535 we find that the first anatomical cluster of cortical thickness continues to predict cross-modal  
536 response ( $p=0.0015$ ), while this relationship is no longer significant for the third anatomical  
537 cluster and DTI measures ( $p=0.087$ ).

538 In sum, individual differences in macroscopic anatomical structure in the blind and sighted  
539 are correlated with individual differences in other measures of brain structure and function.  
540 Importantly, these relationships are separable. Area V1 cortical thickness is related primarily  
541 to cross-modal responses at this site, while the size of the optic chiasm and lateral geniculate are  
542 related to fractional anisotropy within the optic radiations and splenium. In the case of cross-  
543 modal responses, individual variation in cortical thickness are predictive of BOLD response  
544 independently of the group effect of blindness.

---

## 545 Discussion

546 Our study emphasizes the graded nature of structural brain changes that accompany human  
547 blindness, and places them within the context of normal variation in the sighted. Individuals  
548 vary substantially and meaningfully in the relative size of the anatomical components of the  
549 central visual pathway. In normally sighted people, we find the thickness of V1 gray matter  
550 is largely independent of the surface area and white matter volume of V1 cortex, and in turn  
551 independent of the relative size of the optic chiasm and lateral geniculate nucleus. Large,  
552 cross-sectional studies of normally sighted people have previously reported that occipital lobe  
553 surface area and volume are relatively independent from cortical thickness [17, 55, 56], and these  
554 anatomical features have opposite relationships with neural and perceptual measures of visual  
555 discrimination [57].

556 We find these same three clusters of variation in the visual pathway of blind people. It need  
557 not have been so. Blindness could have reconfigured the variation of visual pathway anatomy,  
558 causing, for example, linked atrophy across structures that are normally independent. Instead,  
559 the effect of blindness is to extend the range of variation seen in normal subjects along each  
560 of the three dimensions of visual pathway anatomy. Interestingly, these effects are seen in the  
561 postnatally blind, as well as in the congenitally blind.

### 562 Independent anatomical effects of blindness

563 Across blind participants, there was a varying degree of reduction in the surface area of V1 and  
564 the corresponding white matter volume of visual cortex. In the sighted, the spatial extent of  
565 area V1 is correlated with visual acuity [15] and perceptual discrimination [57]. A recent study  
566 of patients with juvenile and adult onset macular degeneration found roughly equal reductions  
567 in the volume of the optic radiations in both groups [58], consistent with our finding that this  
568 anatomical change can arise in adulthood.

569 Separately, there is linked variation in the size of the optic chiasm and lateral geniculate  
570 nucleus. Variation on this anatomical dimension was correlated with a DTI measure of fractional  
571 anisotropy within the optic radiations and splenium. In cross-sectional studies of children, age  
572 related increases in the fractional anisotropy of regional white matter were found to be correlated  
573 with increases in the associated volume of the region [59]. A similar mechanism may link visual  
574 pathway size and the coherence of white matter.

575 Finally, we find that V1 cortical thickness varies independently from these other anatomical  
576 dimensions. Early synaptic remodeling in response to visual input shapes visual cortex [9],  
577 and has been proposed as the mechanism that produces cortical thinning with development  
578 [59]. We find further that cortical thickness is related to the amplitude of cross-modal response  
579 in striate cortex. This is sensible, as cross-modal responses have themselves been attributed  
580 to the retention of early, exuberant synaptic connections that are pruned as the cortex thins  
581 during normal visual development [60]. A recent study of people with blindness before the age  
582 of two found a similar relationship between cortical thickness and cross modal response [61].  
583 A complementary finding is that individual differences in occipital gray matter across blind  
584 subjects are correlated with the duration of blindness, and in turn correlated with behavioral  
585 performance on non-visual tasks [62, 63].

586 Changes in visual cortex thickness have been described in postnatal causes of vision loss  
587 that involve specific portions of the visual field, although there are conflicting reports as to  
588 the direction of the effect. Young adult carriers of a mitochondrial DNA mutation causing  
589 Leber hereditary optic neuropathy have a loss of macular retinal ganglion cells and thicker  
590 visual cortex gray matter [64]. In contrast, older people with progressive retinal damage from  
591 glaucoma or macular degeneration have thinning in the corresponding eccentric locations of  
592 visual cortex [65–68]. It seems the response of the cortex to retinal damage is influenced by  
593 the spatial distribution of this loss, the age at which it occurs, or both. Earlier studies that

---

594 reported gray matter loss in blinding diseases are difficult to relate to our study as a voxel based  
595 morphometry approach was used which combines changes in thickness and surface area [69].

## 596 Limitations and alternatives

597 While a gradation of anatomical alteration between the congenitally blind, postnatally blind,  
598 and sighted is a feature of our results, we note that there is substantial evidence in support of  
599 categorical, qualitative differences between the blind and sighted, and between the early and  
600 later blind [70]. For example, while cross-modal responses can be found in the visual cortex of  
601 sighted subjects, the particular pattern of evoked activity is different between the groups [71].  
602 Further, temporary inactivation of the occipital cortex in the blind has qualitatively different  
603 effects depending upon the age of blindness onset [72, 73].

604 We make use of standard techniques to segment the gray and white matter tissue compart-  
605 ments, and to subsequently measure cortical thickness [33]. This measurement can be influenced  
606 by the degree of intra-cortical myelination [74] and it is therefore possible that a reduction in  
607 intra-cortical myelination is the cause of what would be an apparent and not actual increase  
608 in occipital cortex thickness in the blind. We note, however, that in our data the measure  
609 of cortical thickness is independent of both the relative volume of the optic radiations and  
610 the fractional anisotropy of this structure, inconsistent with the alternative account. In either  
611 case, a difference in mechanistic interpretation does not alter the general observations that we  
612 make regarding the relationship of the measure of cortical thickness to age of blindness and  
613 cross-modal plasticity.

614 We examined the size and properties of the visual system between the optic chiasm and the  
615 primary visual cortex. The cortical visual system extends far beyond this point, and blindness  
616 has been found to alter both the properties of these higher visual areas and the connections  
617 of visual cortex to other brain regions [21, 75, 76]. We regard the relationship between the  
618 anatomical variation we have measured and the properties of higher visual areas and their  
619 connections as a promising area for future study. As an example of this direction of investigation,  
620 recent work finds that the covariance of early visual cortex thickness with dorsal visual areas  
621 is related to enhanced sensory abilities in the blind [77], and that there are differential effects  
622 of blindness upon dorsal and ventral stream white matter anisotropy [78]. Similarly, our study  
623 examined changes along the retinofugal visual pathway, and not the brainstem system for vision  
624 that includes the superior colliculi. Recent work has shown that, while macroscopic superior  
625 colliculus structure is not altered in the congenitally blind [1], there are changes in its functional  
626 properties [79].

627 Our group of blind subjects varied on many clinical features. We observed a graded degree  
628 of anatomical alteration related to the timing of onset of vision loss. Other aspects of blindness  
629 certainly could contribute to anatomical variation. Differences in acuity, visual fields, light  
630 perception, or involvement of the retinal ganglion cells in the ophthalmologic injury could  
631 influence central visual anatomy in ways the current study is unable to detect.

## 632 Conclusion

633 To a first approximation, differences between the blind and the sighted have been found for every  
634 structural and functional measure obtained along the pathway from optic nerve to visual cortex.  
635 Our study, along with other recent work (e.g., [61, 77]), demonstrates that these numerous  
636 brain changes can be assembled into meaningful sets, and reflect extensions of the variation  
637 seen in normal development. An exciting avenue for further investigation is if particular clinical  
638 properties of blindness produce more or less alteration of the different anatomical clusters of  
639 variation that we find here.

---

## References

1. Cecchetti L, Ricciardi E, Handjaras G, Kupers R, Ptito M, Pietrini P. Congenital blindness affects diencephalic but not mesencephalic structures in the human brain. *Brain Structure and Function*. 2016;221(3):1465–1480.
2. Noppeney U, Friston KJ, Ashburner J, Frackowiak R, Price CJ. Early visual deprivation induces structural plasticity in gray and white matter. *Current Biology*. 2005;15(13):R488–R490.
3. Pan WJ, Wu G, Li CX, Lin F, Sun J, Lei H. Progressive atrophy in the optic pathway and visual cortex of early blind Chinese adults: a voxel-based morphometry magnetic resonance imaging study. *Neuroimage*. 2007;37(1):212–220.
4. Ptito M, Schneider FC, Paulson OB, Kupers R. Alterations of the visual pathways in congenital blindness. *Experimental Brain Research*. 2008;187(1):41–49.
5. Tomaiuolo F, Campana S, Collins DL, Fonov VS, Ricciardi E, Sartori G, et al. Morphometric changes of the corpus callosum in congenital blindness. *PloS one*. 2014;9(9):e107871.
6. Jiang J, Zhu W, Shi F, Liu Y, Li J, Qin W, et al. Thick visual cortex in the early blind. *The Journal of Neuroscience*. 2009;29(7):2205–2211.
7. Park HJ, Lee JD, Kim EY, Park B, Oh MK, Lee S, et al. Morphological alterations in the congenital blind based on the analysis of cortical thickness and surface area. *Neuroimage*. 2009;47(1):98–106.
8. Bridge H, Cowey A, Ragge N, Watkins K. Imaging studies in congenital anophthalmia reveal preservation of brain architecture in ‘visual’ cortex. *Brain*. 2009;132(12):3467–3480.
9. Bourgeois JP, Jastreboff PJ, Rakic P. Synaptogenesis in visual cortex of normal and preterm monkeys: evidence for intrinsic regulation of synaptic overproduction. *Proceedings of the National Academy of Sciences*. 1989;86(11):4297–4301.
10. Stryker MP, Harris WA. Binocular impulse blockade prevents the formation of ocular dominance columns in cat visual cortex. *The Journal of neuroscience*. 1986;6(8):2117–2133.
11. Andrews TJ, Halpern SD, Purves D. Correlated size variations in human visual cortex, lateral geniculate nucleus, and optic tract. *The Journal of Neuroscience*. 1997;17(8):2859–2868.
12. Bakken TE, Roddey JC, Djurovic S, Akshoomoff N, Amaral DG, Bloss CS, et al. Association of common genetic variants in GPCPD1 with scaling of visual cortical surface area in humans. *Proceedings of the National Academy of Sciences*. 2012;109(10):3985–3990.
13. Panizzon MS, Fennema-Notestine C, Eyer LT, Jernigan TL, Prom-Wormley E, Neale M, et al. Distinct genetic influences on cortical surface area and cortical thickness. *Cerebral Cortex*. 2009; p. bhp026.
14. Pearce E, Bridge H. Is orbital volume associated with eyeball and visual cortex volume in humans? *Annals of human biology*. 2013;40(6):531–540.
15. Duncan RO, Boynton GM. Cortical magnification within human primary visual cortex correlates with acuity thresholds. *Neuron*. 2003;38(4):659–671.
16. Frank SM, Reavis EA, Greenlee MW, Peter UT. Pretraining cortical thickness predicts subsequent perceptual learning rate in a visual search task. *Cerebral Cortex*. 2015; p. bhu309.

17. Winkler AM, Kochunov P, Blangero J, Almasy L, Zilles K, Fox PT, et al. Cortical thickness or grey matter volume? The importance of selecting the phenotype for imaging genetics studies. *Neuroimage*. 2010;53(3):1135–1146.
18. Bock AS, Saenz M, Tungaraza R, Boynton GM, Bridge H, Fine I. Visual callosal topography in the absence of retinal input. *Neuroimage*. 2013;81:325–334.
19. Levin N, Dumoulin SO, Winawer J, Dougherty RF, Wandell BA. Cortical maps and white matter tracts following long period of visual deprivation and retinal image restoration. *Neuron*. 2010;65(1):21–31.
20. Shimony J, Burton H, Epstein A, McLaren D, Sun S, Snyder A. Diffusion tensor imaging reveals white matter reorganization in early blind humans. *Cerebral Cortex*. 2006;16(11):1653–1661.
21. Bedny M, Pascual-Leone A, Dodell-Feder D, Fedorenko E, Saxe R. Language processing in the occipital cortex of congenitally blind adults. *Proceedings of the National Academy of Sciences*. 2011;108(11):4429–4434.
22. Sadato N, Pascual-Leone A, Grafman J, Ibañez V, Deiber MP, Dold G, et al. Activation of the primary visual cortex by Braille reading in blind subjects. *Nature*. 1996;380(6574):526–528.
23. Aguirre GK, Komáromy AM, Cideciyan AV, Brainard DH, Aleman TS, Roman AJ, et al. Canine and human visual cortex intact and responsive despite early retinal blindness from RPE65 mutation. *PLoS Med*. 2007;4(6):e230.
24. Aleman TS, Cideciyan AV, Aguirre GK, Huang WC, Mullins CL, Roman AJ, et al. Human CRB1-associated retinal degeneration: comparison with the rd8 Crb1-mutant mouse model. *Investigative ophthalmology & visual science*. 2011;52(9):6898–6910.
25. Cideciyan AV, Aleman TS, Jacobson SG, Khanna H, Sumaroka A, Aguirre GK, et al. Centrosomal-ciliary gene CEP290/NPHP6 mutations result in blindness with unexpected sparing of photoreceptors and visual brain: implications for therapy of Leber congenital amaurosis. *Human mutation*. 2007;28(11):1074–1083.
26. Kucera H, Francis WN. *Computational analysis of present-day American English*. Brown university press; 1967.
27. Dale AM, Fischl B, Sereno MI. Cortical surface-based analysis: I. Segmentation and surface reconstruction. *Neuroimage*. 1999;9(2):179–194.
28. Fischl B, Sereno MI, Dale AM. Cortical surface-based analysis: II: inflation, flattening, and a surface-based coordinate system. *Neuroimage*. 1999;9(2):195–207.
29. Fischl B, Sereno MI, Tootell RB, Dale AM, et al. High-resolution intersubject averaging and a coordinate system for the cortical surface. *Human brain mapping*. 1999;8(4):272–284.
30. Fischl B, Dale AM. Measuring the thickness of the human cerebral cortex from magnetic resonance images. *Proceedings of the National Academy of Sciences*. 2000;97(20):11050–11055.
31. Ségonne F, Dale A, Busa E, Glessner M, Salat D, Hahn H, et al. A hybrid approach to the skull stripping problem in MRI. *Neuroimage*. 2004;22(3):1060–1075.
32. Fischl B, van der Kouwe A, Destrieux C, Halgren E, Ségonne F, Salat DH, et al. Automatically parcellating the human cerebral cortex. *Cerebral cortex*. 2004;14(1):11–22.

33. Fischl B, Salat DH, Busa E, Albert M, Dieterich M, Haselgrove C, et al. Whole brain segmentation: automated labeling of neuroanatomical structures in the human brain. *Neuron*. 2002;33(3):341–355.
34. Sled JG, Zijdenbos AP, Evans AC. A nonparametric method for automatic correction of intensity nonuniformity in MRI data. *IEEE transactions on medical imaging*. 1998;17(1):87–97.
35. Dale AM, Sereno MI. Improved localization of cortical activity by combining EEG and MEG with MRI cortical surface reconstruction: a linear approach. *Journal of cognitive neuroscience*. 1993;5(2):162–176.
36. Fischl B, Liu A, Dale AM. Automated manifold surgery: constructing geometrically accurate and topologically correct models of the human cerebral cortex. *IEEE transactions on medical imaging*. 2001;20(1):70–80.
37. Ségonne F, Pacheco J, Fischl B. Geometrically accurate topology-correction of cortical surfaces using nonseparating loops. *IEEE transactions on medical imaging*. 2007;26(4):518–529.
38. Wang Z, Aguirre GK, Rao H, Wang J, Fernández-Seara MA, Childress AR, et al. Empirical optimization of ASL data analysis using an ASL data processing toolbox: ASLTbx. *Magnetic resonance imaging*. 2008;26(2):261–269.
39. Wang J, Alsop DC, Li L, Listerud J, Gonzalez-At JB, Schnall MD, et al. Comparison of quantitative perfusion imaging using arterial spin labeling at 1.5 and 4.0 Tesla. *Magnetic Resonance in Medicine*. 2002;48(2):242–254.
40. Basser PJ, Mattiello J, LeBihan D. MR diffusion tensor spectroscopy and imaging. *Biophysical journal*. 1994;66(1):259.
41. Aguirre GK, Zarahn E, D’esposito M. The variability of human, BOLD hemodynamic responses. *Neuroimage*. 1998;8(4):360–369.
42. Benson NC, Butt OH, Datta R, Radoeva PD, Brainard DH, Aguirre GK. The retinotopic organization of striate cortex is well predicted by surface topology. *Current Biology*. 2012;22(21):2081–2085.
43. Hinds OP, Rajendran N, Polimeni JR, Augustinack JC, Wiggins G, Wald LL, et al. Accurate prediction of V1 location from cortical folds in a surface coordinate system. *Neuroimage*. 2008;39(4):1585–1599.
44. Destrieux C, Fischl B, Dale A, Halgren E. Automatic parcellation of human cortical gyri and sulci using standard anatomical nomenclature. *Neuroimage*. 2010;53(1):1–15.
45. Hua K, Zhang J, Wakana S, Jiang H, Li X, Reich DS, et al. Tract probability maps in stereotaxic spaces: analyses of white matter anatomy and tract-specific quantification. *Neuroimage*. 2008;39(1):336–347.
46. Wakana S, Caprihan A, Panzenboeck MM, Fallon JH, Perry M, Gollub RL, et al. Reproducibility of quantitative tractography methods applied to cerebral white matter. *Neuroimage*. 2007;36(3):630–644.
47. Bürgel U, Schormann T, Schleicher A, Zilles K. Mapping of histologically identified long fiber tracts in human cerebral hemispheres to the MRI volume of a reference brain: position and spatial variability of the optic radiation. *Neuroimage*. 1999;10(5):489–499.

- 
48. Burzel U, Amunts K, Hoemke L, Mohlberg H, Gilsbach JM, Zilles K. White matter fiber tracts of the human brain: three-dimensional mapping at microscopic resolution, topography and intersubject variability. *Neuroimage*. 2006;29(4):1092–1105.
  49. Eickhoff SB, Stephan KE, Mohlberg H, Grefkes C, Fink GR, Amunts K, et al. A new SPM toolbox for combining probabilistic cytoarchitectonic maps and functional imaging data. *Neuroimage*. 2005;25(4):1325–1335.
  50. Avants B, Gee JC. Geodesic estimation for large deformation anatomical shape averaging and interpolation. *Neuroimage*. 2004;23:S139–S150.
  51. Mazziotta JC, Toga AW, Evans A, Fox P, Lancaster J. A probabilistic atlas of the human brain: Theory and rationale for its development: The international consortium for brain mapping (icbm). *Neuroimage*. 1995;2(2):89–101.
  52. De Volder AG, Bol A, Blin J, Robert A, Arno P, Grandin C, et al. Brain energy metabolism in early blind subjects: neural activity in the visual cortex. *Brain research*. 1997;750(1):235–244.
  53. Veraart C, De Volder A, Wanet-Defalque M, Bol A, Michel C, Goffinet A. Glucose utilization in human visual cortex is abnormally elevated in blindness of early onset but decreased in blindness of late onset. *Brain research*. 1990;510(1):115–121.
  54. Zhang Y, Wan S, Ge J, Zhang X. Diffusion tensor imaging reveals normal geniculocalcarine tract integrity in acquired blindness. *Brain research*. 2012;1458:34–39.
  55. Hogstrom LJ, Westlye LT, Walhovd KB, Fjell AM. The structure of the cerebral cortex across adult life: age-related patterns of surface area, thickness, and gyrification. *Cerebral cortex*. 2012; p. bhs231.
  56. Tamnes CK, Østby Y, Fjell AM, Westlye LT, Due-Tønnessen P, Walhovd KB. Brain maturation in adolescence and young adulthood: regional age-related changes in cortical thickness and white matter volume and microstructure. *Cerebral cortex*. 2010;20(3):534–548.
  57. Song C, Schwarzkopf DS, Kanai R, Rees G. Neural population tuning links visual cortical anatomy to human visual perception. *Neuron*. 2015;85(3):641–656.
  58. Hernowo AT, Prins D, Baseler HA, Plank T, Gouws AD, Hooymans JM, et al. Morphometric analyses of the visual pathways in macular degeneration. *cortex*. 2014;56:99–110.
  59. Taki Y, Thyreau B, Hashizume H, Sassa Y, Takeuchi H, Wu K, et al. Linear and curvilinear correlations of brain white matter volume, fractional anisotropy, and mean diffusivity with age using voxel-based and region-of-interest analyses in 246 healthy children. *Human brain mapping*. 2013;34(8):1842–1856.
  60. Innocenti G, Clarke S. Bilateral transitory projection to visual areas from auditory cortex in kittens. *Developmental Brain Research*. 1984;14(1):143–148.
  61. Anurova I, Renier LA, De Volder AG, Carlson S, Rauschecker JP. Relationship between cortical thickness and functional activation in the early blind. *Cerebral Cortex*. 2014; p. bh009.
  62. Voss P, Pike BG, Zatorre RJ. Evidence for both compensatory plastic and disuse atrophy-related neuroanatomical changes in the blind. *Brain*. 2014;137(4):1224–1240.



- 
63. Voss P, Zatorre RJ. Occipital cortical thickness predicts performance on pitch and musical tasks in blind individuals. *Cerebral Cortex*. 2011; p. bhr311.
  64. d’Almeida OC, Mateus C, Reis A, Grazina MM, Castelo-Branco M. Long term cortical plasticity in visual retinotopic areas in humans with silent retinal ganglion cell loss. *Neuroimage*. 2013;81:222–230.
  65. Bogorodzki P, Piatkowska-Janko E, Szaflik J, Szaflik JP, Gacek M, Grieb P. Mapping cortical thickness of the patients with unilateral end-stage open angle glaucoma on planar cerebral cortex maps. *PloS one*. 2014;9(4):e93682.
  66. Burge WK, Griffis JC, Nenert R, Elkhetafi A, DeCarlo DK, Ver Hoef LW, et al. Cortical thickness in human V1 associated with central vision loss. *Scientific reports*. 2016;6.
  67. Prins D, Plank T, Baseler HA, Gouws AD, Beer A, Morland AB, et al. Surface-Based Analyses of Anatomical Properties of the Visual Cortex in Macular Degeneration. *PloS one*. 2016;11(1):e0146684.
  68. Yu L, Xie B, Yin X, Liang M, Evans AC, Wang J, et al. Reduced cortical thickness in primary open-angle glaucoma and its relationship to the retinal nerve fiber layer thickness. *PloS one*. 2013;8(9):e73208.
  69. Plank T, Frolo J, Brandl-Rühle S, Renner AB, Hufendiek K, Helbig H, et al. Gray matter alterations in visual cortex of patients with loss of central vision due to hereditary retinal dystrophies. *Neuroimage*. 2011;56(3):1556–1565.
  70. Merabet LB, Pascual-Leone A. Neural reorganization following sensory loss: the opportunity of change. *Nature Reviews Neuroscience*. 2010;11(1):44–52.
  71. Lewis LB, Saenz M, Fine I. Mechanisms of cross-modal plasticity in early-blind subjects. *Journal of neurophysiology*. 2010;104(6):2995–3008.
  72. Cohen LG, Weeks RA, Sadato N, Celnik P, Ishii K, Hallett M. Period of susceptibility for cross-modal plasticity in the blind. *Annals of neurology*. 1999;45(4):451–460.
  73. Cohen LG, Celnik P, Pascual-Leone A, Corwell B, Faiz L, Dambrosia J, et al. Functional relevance of cross-modal plasticity in blind humans. *Nature*. 1997;389(6647):180–183.
  74. Glasser MF, Van Essen DC. Mapping human cortical areas in vivo based on myelin content as revealed by T1-and T2-weighted MRI. *The Journal of Neuroscience*. 2011;31(32):11597–11616.
  75. Butt OH, Benson NC, Datta R, Aguirre GK. The fine-scale functional correlation of striate cortex in sighted and blind people. *The Journal of Neuroscience*. 2013;33(41):16209–16219.
  76. Deen B, Saxe R, Bedny M. Occipital cortex of blind individuals is functionally coupled with executive control areas of frontal cortex. *Journal of cognitive neuroscience*. 2015;.
  77. Voss P, Zatorre RJ. Early visual deprivation changes cortical anatomical covariance in dorsal-stream structures. *Neuroimage*. 2015;108:194–202.
  78. Reisleiv NL, Kupers R, Siebner HR, Ptito M, Dyrby TB. Blindness alters the microstructure of the ventral but not the dorsal visual stream. *Brain Structure and Function*. 2015; p. 1–13.
  79. Coullon GS, Jiang F, Fine I, Watkins KE, Bridge H. Subcortical functional reorganization due to early blindness. *Journal of neurophysiology*. 2015;113(7):2889–2899.
